# Supplementary material
Source: ML conference proceedings conference paper supplement (https://proceedings.neurips.cc/paper_files/paper/2022/hash/112bfcff816203efbb986bc178380ef2-Abstract.html)
Supplement: Supplementary file 1 [file 112bfcff816203efbb986bc178380ef2-Supplemental-Conference.zip]

Archive with 2 entries (2 files):
- appendix.pdf
- Obj2Seq-main.zip
